# Supplementary material
Source: HighWire-hosted journal article supplement (https://cmaj.ca/highwire/filestream/58706/field_highwire_adjunct_files/3/statins-manns-4-at.pdf)
Supplement: statins-manns-4-at.pdf [file statins-manns-4-at.pdf]

**Appendix 4 (as supplied by the authors): Influence analyses for all-cause mortality**

| <b>Study omitted*</b>              | <b>No. of studies</b> | <b>Total N</b> | <b>RR (95% CI)</b> |
|------------------------------------|-----------------------|----------------|--------------------|
| ACAPS 1994 <sup>38</sup>           | 18                    | 77,402         | 0.91 (0.85, 0.98)  |
| AFCAPS/TexCAPS 1998 <sup>39</sup>  | 18                    | 71,716         | 0.89 (0.82, 0.97)  |
| ALLHAT-LLT 2002 <sup>40</sup>      | 18                    | 67,966         | 0.85 (0.77, 0.93)  |
| ASCOT-LLA 2003 <sup>36</sup>       | 18                    | 68,016         | 0.90 (0.82, 0.99)  |
| CAIUS 1996 <sup>42</sup>           | 18                    | 78,016         | 0.90 (0.83, 0.97)  |
| EXCEL 1991 <sup>45</sup>           | 18                    | 70,076         | 0.91 (0.84, 0.97)  |
| HYRIM 2005 <sup>28</sup>           | 18                    | 77,753         | 0.90 (0.82, 0.97)  |
| JUPITER 2008 <sup>4</sup>          | 18                    | 60,519         | 0.93 (0.86, 1.00)  |
| KAPS 1995 <sup>41</sup>            | 18                    | 77,874         | 0.90 (0.83, 0.97)  |
| KLIS 2000 <sup>37</sup>            | 18                    | 74,468         | 0.90 (0.83, 0.98)  |
| MEGA 2006 <sup>24</sup>            | 18                    | 70,489         | 0.92 (0.86, 0.99)  |
| METEOR 2007 <sup>34</sup>          | 18                    | 77,337         | 0.90 (0.82, 0.97)  |
| PHYLLIS 2004 <sup>30</sup>         | 18                    | 77,813         | 0.90 (0.83, 0.97)  |
| PREVEND-IT 2004 <sup>31</sup>      | 18                    | 77,457         | 0.90 (0.82, 0.97)  |
| WOSCOPS 1995 <sup>43</sup>         | 18                    | 71,726         | 0.92 (0.86, 0.99)  |
| Holmberg et al. 2005 <sup>26</sup> | 18                    | 78,178         | 0.90 (0.82, 0.97)  |
| Bruckert et al. 2003 <sup>33</sup> | 18                    | 77,092         | 0.90 (0.82, 0.97)  |
| LEADe 2010 <sup>46</sup>           | 18                    | 77,682         | 0.90 (0.84, 0.97)  |
| LORD 2010 <sup>48</sup>            | 18                    | 78,198         | 0.90 (0.82, 0.97)  |

Note: CI = confidence interval, RR = relative risk.

\*These sensitivity analyses were done by calculating relative risks after omitting one study at a time. For the complete study names, see Box 1 in the main article.

For the complete citations of the studies, see the reference list in the main article.
